# Supplementary material for: A 17-year time-series of diatom populations‘ flux and composition in the Mauritanian coastal upwelling
Source: Frontiers journal article supplement (doi:10.3389/fmars.2022.1006345), 2022-10-03
Supplement: Table_1.docx [file Table_1.docx]

**Supplementary Material**

**A 17-year time-series of diatom populations’ flux and composition in the Mauritanian coastal upwelling**

Oscar E. Romero1, 2 and Simon Ramondenc1, 2

1MARUM – Center for Marine Environmental Sciences, University of Bremen, Leobener Str. 8, 28359 Bremen, Germany

2Alfred Wegener Institute, Helmholtz Centre for Polar and Marine Research, Am Alten Hafen 26, 27568 Bremerhaven, Germany

Supplementary Table 1: Species composition of diatom groups at site CBeu between June 2003 and March 2020.

|  | | |  |
| --- | --- | --- | --- |
| Group Species | | | Main References |
| 1) | Benthic |  |  |
|  |  | | *Actinoptychus* *senarius* | | --- | | *Actinoptychus* *vulgaris* | | *Biddulphia alternans*  *Cocconeis* spp. | | *Delphineis surirella* | | *Diploneis* spp. | | *Gomphonema* spp. | | *Odontella mobiliensis*  *Paralia sulcata* | | *Psammodyction panduriformis* | | *Rhaphoneris amphiceros* | | *Tryblionella* spp. | | Andrews (1981), Round et al. (1990), Hasle and Syvertsen (1996). |
| 2) | Coastal upwelling | | |
|  |  | | *Chaetoceros affinis* | | --- | | *Chaetoceros cinctus* | | *Chaetoceros compresus* | | *Chaetoceros constrictus* | | *Chaetoceros coronatus* | | *Chaetoceros debilis* | | *Chaetoceros diadema* | | *Chaetoceros radicans*  *Thalassionema nitzschioides* var. *nitzschioides* | | Hasle and Syvertsen (1996); Abrantes et al. (2002); Nave et al., 2001; Romero et al., 2002; Romero and Armand, 2010) |
| 3) | Coastal planktonic | | |
|  |  | | *Actinocyclus curvatulus* | | --- | | *Actinocyclus octonarius* | | *Actinocyclus subtilis* | | *Azpeitia barronii* | | *Chaetoceros concavicornis* (vegetative cell) | | *Coscinosdiscus argus* | | *Coscinosdiscus centralis* | | *Coscinosdiscus radiatus* | | *Cyclotella litoralis* | | *Proboscia alata* | | *Shionodiscus oestrupii* var. *venrickae* | | *Stellarima stellaris* | | *Thalassionema pseudonitzschioides* | | *Thalassiosira binata* | | *Thalassiosira conferta* | | *Thalassiosira delicatula* | | *Thalassiosira dyporocyclus* | | *Thalassiosira elsayedii* | | *Thalssiosira poro-irregulata* | | *Thalassiosira rotula* | | Romero and Armand (2010), Romero and Fischer (2017); Crosta et al. (2012); Romero et al. (2009, 2020) |
| 4) | Open-ocean | | |
|  |  | | *Alveus marinus* | | --- | | *Aserolampra marylandica* | | *Asteromphalus arachne* | | *Asteromphalus cleveanus* | | *Asteromphalus flabellatus* | | *Asteromphalus heptactis* | | *Asteromphalus sarcophagus* | | *Azpetia africana* | | *Azpetia neocrenulata* | | *Azpetia nodulifera* | | *Azpetia tabularis* | | *Bacteriastrum elongatum* | | *Bogorovia* spp.  *Coscinodiscus reniformis*  *Detonula pumila* | | *Fragilariopsis doliolus*  *Guinardia cyclindrus*  *Haslea* spp. | | *Hemidiscus cuneiformis* | | *Leptocyclindrus mediterraneus* | | *Nitzschia aequatoriale*  *Nitzschia bicapitata* | | *Nitzschia capuluspalae* | | *Nitzschia interruptestriata* | | *Nitzschia sicula* | | *Nitzschia sicula* var. *rostrata* | | *Planktoniella sol* | | *Pseudo-nitzschia* spp. | | *Pseudosolenia calcar-avis* | | *Pseudotriceratium punctatum* | | *Rhizosolenia acuminata* | | *Rhizosolenia bergonii* | | *Rhizosolenia imbricatae* | | *Rhizosolenia robusta* | | *Rhizosolenia setigera* | | *Rhizosolenia styliformis* | | *Roperia tessellata* | | *Shionodiscus oestrupii* var. *oestrupii* | | *Thalassionema bacillare* | | *Thalassionema frauenfeldii* | | *Thalassionema nitzschioides* var*. capitulata* | | *Thalassionema nitzschioides* var*. inflata* | | *Thalassionema nitzschioides* var*. lanceolata* | | *Thalassionema nitzschioides* var*. parva* | | *Thalassiosira eccentrica* | | *Thalassiosira endoseriata* | | *Thalassiosira ferelineata* | | *Thalassiosira lentiginosa* | | *Thalassiosira leptopus* | | *Thalassiosira lineata* | | *Thalassiosira nanolineata* | | *Thalassiosira parthenia* | | *Thalassiosira plicata* | | *Thalassiosira punctigera* | | *Thalassiosira sacketii* var. *sacketii* | | *Thalassiosira sacketii* var. *plana* | | *Thalassiosira subtilis* | | *Thalassiosira symmetrica* | | *Thalassiothrix* spp. | | Romero and Armand (2010), Romero and Fischer (2017), Romero et al. (2005), Crosta et al. (2012), Romero et al. (2020). |

**References**

Abrantes, F., Meggers, H., Nave, S., Bollman, J., Palma, S., Sprengel, C., et al. (2002). Fluxes of micro-organisms along a productivity gradient in the Canary Islands region (29°N): implications for paleoreconstructions. *Deep-Sea Res*. II 49, 3599-3629.

Andrews, G. W. (1981). Revision of the diatom genus *Delphineis* and morphology of *Delphineis surirella* (Ehrenberg) G. W. Andrews, n. comb, edited by: Ross, R., Proc. Sixth Diatom Symp., Otto Koeltz, Koenigstein, 81–92.

Crosta, X., Romero, O. E., Ther, O., and Schneider, R. R. (2012) Climatically-controlled siliceous productivity in the eastern Gulf of Guinea during the last 40000yr. *Clim. Past* 8, 415–431, https://doi.org/10.5194/cp-8-415-2012.

Hasle, G. A., and Syvertsen, E. E. (1996). Marine diatoms, in: *Identifying marine diatoms and dinoflagellates*, edited by: Thomas, C., Academic Press, Inc. San Diego, CA, 1–385.

Nave, S., Freitas, P., and Abrantes, F. (2001). Coastal upwelling in the Canary Island region: spatial variability reflected by the surface sediment diatom record. *Mar. Micropaleontol*. 42, 1–23.

Romero, O. E., Lange, C.B., and Wefer, G. (2002). Interannual variability (1988-1991) of siliceous phytoplankton fluxes off northwest Africa. *J. Plank. Res*. 24(10), 1035-1046. doi:1010.1093/plankt/1024.1010.10352002, 2002.

Romero, O. E., Rixen, T., and Herunadi, B. (2009a). Effects of hydrographic and climatic forcing on diatom production and export in the tropical southeastern Indian Ocean. *Mar. Ecol. Progr. Ser*. 384, 69–82, doi: 10.3354/meps08013.

Romero, O. E., Thunell, R. C, Astor, Y., and Varela, R. (2009b). Seasonal and interannual dynamics in diatom production in the Cariaco Basin, Venezuela. *Deep-Sea Res. I* 56(4), 571-581, doi:510.1016/j.dsr.2008.1012.1005.

Romero, O. E. and Armand, L. K. (2010).Marine diatoms as indicators of modern changes in oceanographic conditions, in: *The Diatoms, Applications for the Environmental and Earth Sciences* (Second Edition), edited by: Smol, J. P. and Stoermer, E. F., Cambridge University Press, Cambridge, 373–400.

Romero, O. E., and Fischer, G. (2017).Shift in the species composition of the diatom community in the eutrophic Mauritanian coastal upwelling: Results from a multi-year sediment trap experiment (2003 – 2010). *Prog. Oceanogr*. 159, 31-44.

Romero, O. E., Baumann, K.-H., Zonneveld, K. A. F., Donner, B., Hefter, J., Hamady, B., et al. (2020). Flux variability of phyto- and zooplankton communities in the Mauritanian coastal upwelling between 2003 and 2008. *Biogeosciences* 17(1), 187-214, https://doi.org/110.5194/bg-5117-5187-2020.

Round, F. E., Crawford, R. M., and Mann, D. G. (1990). *The diatoms*, Cambridge University Press, Cambridge, 747 pp.
